# Supplementary material
Source: PubMed Central journal article supplement (PMC3853317)
Supplement: mmc2.pdf [file mmc2.pdf]

# Pleomorphic Ensembles: Formation of Large Clusters Composed of Weakly Interacting Multivalent Molecules

Cibele V. Falkenberg,\* Michael L. Blinov, and Leslie M. Loew\*

Richard D. Berlin Center for Cell Analysis and Modeling, University of Connecticut Health Center, Farmington, Connecticut, United States of America

**ABSTRACT** Molecular interactions of importance to cell biology are subject to sol-gel transitions: large clusters of weakly interacting multivalent molecules (gel phase) are produced at a critical concentration of monomers. Examples include cell-cell and cell-matrix adhesions, nucleoprotein bodies, and cell signaling platforms. We use the term pleomorphic ensembles (PEs) to describe these clusters, because they have dynamic compositions and sizes and have rapid turnover of their molecular constituents; this plasticity can be highly responsive to cellular signals. The classical polymer physical chemistry theory developed by Flory and Stockmayer provides a brilliant framework for treating multivalent interactions for simple idealized systems. But the complexity and variability of PEs challenges existing modeling approaches. Here we describe and validate a computational algorithm that extends the Flory-Stockmayer formalism to overcome the limitations of analytic theories. We divide the problem by deterministically calculating the fraction of bound sites for each type of binding site, followed by the stochastic assignment of the bonds to a finite number of molecules. The method allows for high valency within many different kinds of interacting molecules and site types, permits simulation of steady-state distributions, as well as assembly kinetics, and can treat cooperative binding within one of the interacting molecules. We then apply our method to the analysis of interactions in the nephrin-Nck-N-Wasp signaling system, demonstrating how multivalent layered scaffolds produce PEs at low monomer concentrations despite weak binding interactions. We show how the experimental data for this system are most consistent with synergistic cooperative interactions between Nck and N-Wasp.

## INTRODUCTION

Multivalency may lead to the formation of large molecular clusters or polymers even when the individual binding affinities are weak. Several examples serve to illustrate the diversity and ubiquity of such systems in cells: nephrin-Nck-N-Wasp, believed to be essential for maintenance of the filtration barrier in the kidney (1,2); P-granules, characteristic of embryo development (3); mRNA granules, an essential mechanism for delivering messages over large distances in neuronal cells (4); the assembly and dynamics of focal adhesions during cell migration (5); postsynaptic density regions in excitatory neuronal synapses (6); and the aggregation of receptor signaling platforms (7). Such interactions lead to the formation of molecular clusters that increase local concentration of biomolecules, potentially triggering signaling events. Because these complexes are often plastic, with dynamic and variable composition, they have been called pleomorphic ensembles (PEs), to distinguish them from machines, assemblies of strongly and specifically interacting molecules (8).

Analytical and numerical modeling of multimeric complexes have a rich history, originating with the classical theories of Paul Flory and Walter Stockmayer (7,9–16). The Flory-Stockmayer (F-S) theory provides nonspatial analytical expressions to predict the properties of polymers arising from multivalent monomers. Given the valencies and

binding-site affinities of the monomers, the F-S theory predicts the concentration dependence of cluster-size distribution and the composition of the clusters (9,17). The existence of a soluble (sol) phase and a macroscopic aggregate, or gel phase is a common feature of these systems, and the F-S theory can predict the critical concentration of monomers for the sol-gel transition. This is possible via the parameter  $p_c$ , commonly referred to as the percolation threshold, or the critical degree of reaction between individual binding sites that leads to the formation of an infinitely large polymer (gel phase). In these studies,  $p$  corresponds to the fraction of reacted sites, or probability of bond formation. Thus, the configuration of the system is characterized by the valency of the monomers and the value  $p$ , regardless of the history of the system. Therefore, if the forward and reverse rate constants for site binding are known, the F-S theory can predict the kinetics of cluster formation as readily as the final steady state, as recently reviewed (18). The key equations arising from the F-S theory are provided in the [Supporting Material](#) for the convenience of the reader, although full treatments can be found elsewhere (9,10,13,17); we also provide a web-based tool (<http://vcell.org/SimGel/>) for generating sol-gel transition diagrams based on the classical F-S theory.

Analytical models based on the original F-S theory are restricted to simple cases (e.g., no more than two types of binding sites)—a fundamental limitation (9,10,19,20). In addition, a key simplifying assumption of the F-S theory is that all sites are subject to equal reactivity. This states

Submitted August 13, 2013, and accepted for publication October 18, 2013.

\*Correspondence: [falkenberg@uchc.edu](mailto:falkenberg@uchc.edu) or [les@vlt.uchc.edu](mailto:les@vlt.uchc.edu)

Editor: Dennis Bray.

© 2013 by the Biophysical Society  
0006-3495/13/12/2451/10 \$2.00

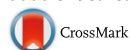

that the probability of bond formation for any binding site is independent of the state of the molecule it belongs to (whether it is a monomer or part of a PE). It is justified for systems with both noncooperative binding-site interactions and binding rates slower than the diffusion-limited rate (where most collisions do not result in binding). In particular, this does not allow for the possibility of increased rates of formation of internal rings within clusters. As a consequence, the equal-reactivity assumption makes small rings highly unlikely in the sol phase, where the probability of binding with sites outside a given cluster will be dominant. However, a series of spatial numerical simulations confirmed the validity of the F-S theory for 3D systems of rigid monomers (21–23), demonstrating the applicability of the equal-reactivity assumption for this scenario.

Biological PE systems (8), such as interactions between modular protein binding domains or between proteins and nucleic acids, involve several different multivalent monomers interacting through many more than just two types of binding sites. Therefore, they cannot be treated with the analytical F-S theory. Because systems of multimeric complexes may lead to the formation of an infinite number of species, it is necessary to solve such problems stochastically with particle-based or network-free simulators, and a number of nonspatial software tools are available (24–26). However, none of these solvers takes advantage of the aforementioned simplifications inherent in the F-S theory.

In this article, we describe an efficient hybrid (deterministic + stochastic) nonspatial algorithm that makes use of the principles used to derive the F-S theory to treat PEs subject to sol-gel transitions. The algorithm extends the theory to account for ring formation and can treat both equal reactivity and cooperative binding. The deterministic part of the algorithm identifies the probabilities of interactions at a given time point, which serves as an input to the stochastic part. The latter consists of the random establishment of bonds, clustering, and statistics. We show that using our approach we reach the same results as fully stochastic solvers. We find that the percolation threshold (the transition to the gel phase) can be robustly identified by the occurrence of rings in the largest cluster, rather than the fraction of molecules in the largest cluster. Because specific sequences of binding sites may act as supramolecules (6,27), we address the impact of synergistic interactions on the sol-gel transition diagrams. Finally, we apply our algorithm to the multi-domain interactions between nephrin, Nck, and N-Wasp.

## MATERIALS AND METHODS

The deterministic solutions were obtained using Mathematica (Wolfram, Champaign, IL), Matlab (The MathWorks, Natick, MA), or BioNetGen (28). The algorithm for the stochastic part was written in Perl. The average properties and plots were obtained using Mathematica. RuleMonkey 2.0.25 (26) and KaSim 2.01 (25) were used to compare fully stochastic simulations to our hybrid method (see Fig. 2). The corresponding input files are presented in the [Supporting Material](#).

## RESULTS

### A multistep deterministic-stochastic algorithm for modeling PEs

We developed a numerical algorithm, substantially extending the F-S theory, that allows for the efficient nonspatial simulation of the kinetics of cluster formation from multivalent monomers. The algorithm can accommodate multiple monomer types and multiple binding-site types. The central concept of the F-S theory is that the reactions between individual binding sites can be treated independently (equal reactivity). Therefore, in our algorithm, the multivalent monomers are first broken into the appropriate concentrations of binding sites. The reactions between sites are evaluated deterministically at a series of time points as a function of binding and unbinding-rate constants and the concentration of sites. This results in a fraction of bound sites for each type of binding site at each time point. We then assign indices to a fixed number of monomers and randomly assign these identifiers to the previously determined fraction of bound sites. The sites are then reconnected into the corresponding multivalent molecules and the clusters are identified. The procedure is repeated multiple times to generate statistics. Molecules formed by sites subject to the equal-reactivity assumption are broken into as many modules as the valency. Molecules with all binding sites subject to cooperativity cannot be broken into smaller independent modules, and the algorithm is adapted for such a scenario. By cooperativity we mean that the binding-rate constant for a given site is a function (activating or inhibiting) of the current site occupancy of the molecule it belongs to (29). With the aid of Fig. 1, we now explain each of the four steps in detail:

#### Step 1

The objective of this step is to reduce the potentially infinite system of equations (with one equation describing each potential PE composition and connectivity) to a finite system. For molecules subject to equal reactivity, this involves calculating the fractions of occupied sites at each time point,  $p_i(t)$ , where index  $i$  corresponds to one of the binding-site types. For steady-state calculations ( $t = \infty$ ), this simply requires solution of algebraic equations using the given binding-site affinities. To model a kinetic time course, a system of ordinary differential equations (ODEs) is integrated, with one rate equation per site type. Conventional units, such as concentrations in micromolar, can be used. Conservation of mass provides the algebraic equations relating number of occupied and free sites. This step of the process is completely equivalent to treating all the binding sites as monovalent molecules and is therefore computationally trivial. The key output,  $p_i(t)$ , corresponds to the probability of a site of type  $i$  being occupied; it is simply calculated as the concentration of occupied  $i$  sites divided by the total concentration of  $i$  sites. This step represents a reduction of the system from an infinite number of

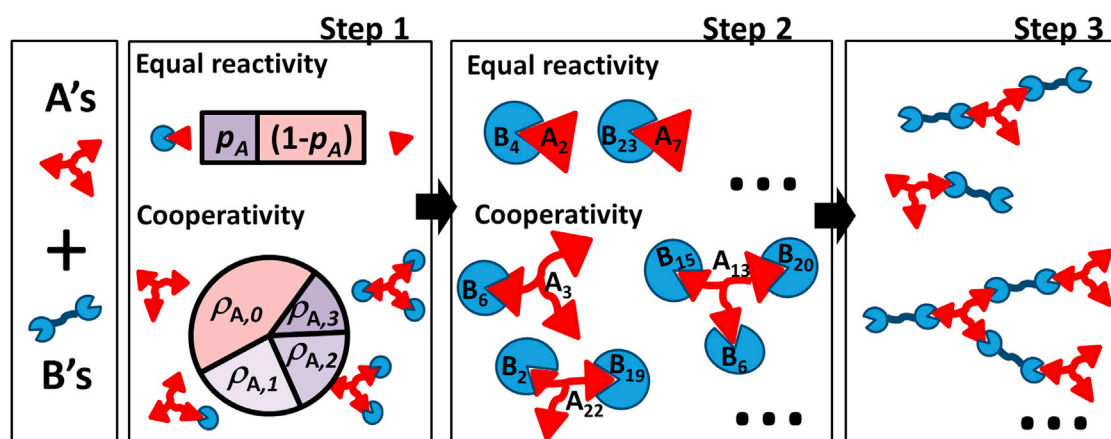

FIGURE 1 Method workflow. This illustrative example is for a system with trivalent molecules A ( $m = 3$ ) and bivalent molecules B ( $n = 2$ ). In Step 1, all molecules subject to equal reactivity are split into sites. If both molecule types, A and B, are subject to equal reactivity (Step 1, upper), the probability of bond formation,  $p_A$ , is calculated. If A is subject to cooperativity (Step 1, lower), the fractions  $\rho_0, \dots, \rho_m$  of molecules with 0 to  $m$  occupied sites are determined. In Step 2, sites are randomly chosen to establish bonds between a fixed number of molecules,  $A_i$  and  $B_j$ . In the equal-reactivity case, the bonds are established between pairs removed from the list of type A sites and the list of type B sites. In the cooperativity case, the vector of type A molecules (with a single copy per molecule), is used instead. Bonds are organized into clusters at Step 3; the clustering algorithm is fully described in Fig. S1. To see this figure in color, go online.

species (monomers, dimers, trimers ...) to a finite number of binding-site types.

A finite system is also possible for binding sites subject to cooperativity within a molecule, as long as their respective binding partners are still subject to equal reactivity. The number of required ODEs corresponds to the number of states the cooperative molecules have plus the number of types of equal-reactivity sites in the system. The output for this case is  $\rho_{A,l}(t)$ , computed as the ratio between the concentration of cooperative molecules A in state  $l$  divided by the total concentration of A molecules.

### Step 2

The stochastic part of the algorithm consists of translating the results from the deterministic step, which characterize the states of sites and molecules, into a discrete list of bonds for each time point. In this step, we choose a specified number of molecules, proportional to the respective concentration of each type of monomer, with each molecule assigned an individual index number; 1000 molecules usually suffices to produce robust results (see below). Sites displaying equal-reactivity interactions are stored in lists that carry the name and index number of the molecule. There is a list for each site type, and the valencies determine the number of identical objects in the list. Bonds between two sites that are subject to equal reactivity are randomly assigned to generate a list of paired site indices until the number of bonds relative to total sites satisfies the probability  $p_i(t)$ . The remaining unbound sites are left in their own lists, with a number corresponding to  $1 - p_i(t)$ .

Cooperative molecules are stored in lists as complete objects, containing molecule name and index number. The bond assignments corresponding to each state  $l$  are per-

formed sequentially. For a given state  $l$ , one cooperative molecule is randomly removed from its list and paired with as many sites as determined by its state. For example, let  $\rho_{A,2B}$  represent the fraction of molecules A that have two sites bound to sites of type B. For every object removed from the list of molecules A, two objects are randomly removed from the list of type B sites, and two bonds are stored in the list of bonds. If  $\rho_{A,2B} = 0.3$  in a system with 1000 molecules A, this procedure is repeated 300 times.

To summarize, the output of this step is a list of randomly selected bonds between a population of molecules, representing one instantiation of the fractional binding-site occupancies calculated in step 1 for time  $t$ .

### Step 3

This step identifies the molecular clusters by searching through the list of bonds for molecules linked by more than one bond (i.e., a molecule's index appears in several bonds). The first element in the list is compared to the last element of the list to see if they have any molecules in common. If they do, the first element is removed and the last element now has the two bonds connecting the three molecules and represents a cluster. We move on to the new first element and compare it to the last element of the list. If false, we compare the first element to the second element from the end and so on until the test is true (and the first element is again removed and added to the cluster containing at least one of its molecules); if the first element is reached without finding any molecules in common with any of the other elements in the list, this element corresponds to a simple dimer and is kept in the list. The process then continues by moving to the second element, and the iterations are repeated until the last two elements of the

list are compared. This step is represented in Fig. S1 in the Supporting Material. The output of this step is thus a list of all the clusters, with explicit account of their sizes, composition and bond connectivity.

#### Step 4

The average properties of the system are obtained by repeating Steps 2 and 3. Among the average properties that we compute are the size of the largest cluster, molecular composition of clusters, number of bonds of each type, number of rings (one plus the difference between the total number of bonds and the total number of molecules in the cluster (10)), etc.

The following sections illustrate the multiple types of data we can produce. The algorithm is validated against both analytical theory and existing fully stochastic numerical algorithms. Although it is easier to conceptualize in terms of two monomer species, each with identical binding sites, the method is fully general for multiple monomeric species, each with multiple binding domain types and multiple valencies. Indeed, below, we treat the interaction between trivalent nephrin and a single binding site on Nck (SH2 domain), together with the interaction of three SH3 domains on Nck with pentavalent N-Wasp proline-rich motifs. Furthermore, we show how outputs of our numerical approach can be used to extend the predictive power of the F-S theory to more complex systems that cannot be treated analytically.

### Demonstration and validation: kinetics of PE formation in a cooperative system

We first illustrate our method with the trivalent-ligand-bivalent-receptor system, where a trivalent soluble ligand L binds to one of two sites on a membrane-associated receptor R and can then cross-link on the membrane by binding to other receptors. This is a convenient numerical example, since its rings-forbidden version has been extensively studied both analytically (7) and numerically (24,26,30,31), and its properties are discussed in the literature in great detail. Here we focus on validating our method.

Of course, the ability to form internal rings will be dependent on the flexibility of the monomers within the cluster (32). To show that our algorithm can reproduce time-dependent responses, we treat this system under the condition that ring formation is allowed.

The trivalent-ligand-bivalent-receptor system is solved using two independent binding-rate constants. The first,  $k_{1+}$ , concerns the binding of a free ligand and a free site on a membrane-bound receptor. The second,  $k_{2+}$ , concerns the binding of a ligand that is already linked to the membrane via any receptor site. All bonds dissociate at the fixed rate constant  $k_-$ . Although there may not be cooperativity at the molecular level, the biological context forces cooperative behavior: the targeting of the ligand to the membrane results in a modified binding rate for the binding to the next two receptors. Specifically, this behavior results in different affinities for the first versus the second and third L binding sites, thus defining L as a cooperative molecule.

In Step1, the receptor sites  $sR$  can be treated as subject to the equal-reactivity assumption. The ligand L must be treated as a cooperative molecule: the binding rate depends on the state of the ligand (whether it is free or with at least one bond). The ODEs for this system are presented in the Supporting Material. The deterministic solution for this small system of equations as a function of time (Fig. 2 A) is used as an input for the stochastic part of the algorithm. We generate clusters using the values of  $\rho_{L,l}$  for specific time points and compare the results with the numerical solutions from two fully stochastic solvers (RuleMonkey and KaSim (25,26)) that compute binding and unbinding reactions for all necessary time steps up to the time point of interest. The mean PE size,  $\langle S \rangle$ , is a common output of interest for this system. It is defined as the average number of receptors in clusters with at least two receptors (30). Fig. 2 B shows that the three solvers result in equivalent numerical solutions.

This result shows that the method described can be used to properly model cluster formation for systems with cooperativity in a time-dependent fashion. The impact is that numerical computation of systems with binding-rate constants slower than the diffusion limit can benefit from 1)

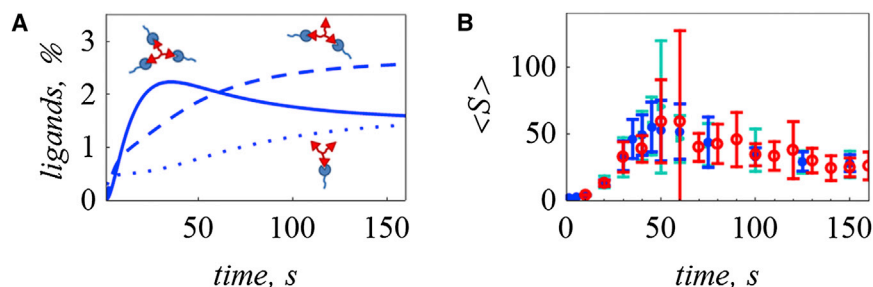

FIGURE 2 Comparison between simulations using our method and fully stochastic methods. Simulations were performed with 300 receptors, 5000 ligands,  $k_{1+} = 1.8 \times 10^{-6}$  (molecules  $s^{-1}$ ),  $k_{2+} = 5.6 \times 10^{-4}$  (molecules  $s^{-1}$ ), and  $k_- = 0.01 s^{-1}$ . (A) The percentages of ligands with one to three bonds are calculated deterministically, as described in Step1. (B) Steps 2 and 3 are repeated 40 times and the average value for  $\langle S \rangle$  (mean PE size) is reported, using the results from A at the time points indicated by the blue dots in B. The results are equivalent to fully stochastic simulations using RuleMonkey (red open circles) and KaSim (green triangles) (means over 40 independent simulations). To see this figure in color, go online.



reducing the number of equations needed (a potentially infinite number of ODEs is replaced by a small system of ODEs); and 2) avoiding computation of individual stochastic reaction events.

### The occurrence of rings in the largest cluster robustly identifies the sol-gel transition

A great contribution from analytical F-S theory is the prediction of the percolation threshold, or critical degree of reaction,  $p_c$ , for the sol-gel transition. In particular, the F-S theory allows calculation of the fraction of monomers that belong to the gel phase,  $W_g$ , a parameter that is null for  $p \leq p_c$  and increases steeply at  $p > p_c$  (9) (Fig. 3). However, the analytical expressions are limited to simple systems with up to only two site types. The identification of numerical outputs that are the most robust correlates of the theory would enable the prediction of the sol-gel transition when modeling systems are too complex to be handled analytically. Here, to establish such numerical outputs, we compare the fraction of molecules in the largest cluster,  $W_{LC}$ , and the occurrence of rings in the largest cluster with the analytical F-S theory predictions.

Consider a system with two molecule types, A and B, with concentrations  $c_A = c_B$ . Each molecule has  $m$  binding sites. In such symmetric systems,  $p_A = p_B$  and the F-S theory predicts the existence of a gel phase for values of  $p_A$  larger than  $p_{A,c} = 1/(m - 1)$ . As seen in Fig. 3,  $W_g$  increases abruptly as soon as  $p_A > p_{A,c}$ , offering an experimentally accessible observable for the analysis of sol-gel systems. However,  $W_g$  can only be calculated from the analytical expressions derived for such simple systems.

The fraction of molecules belonging to the largest cluster,  $W_{LC}$ , is the numerical correlate of  $W_g$ .  $W_{LC}$  has been used previously to identify the presence of a gel phase in systems where intramolecular interactions are forbidden, with the gel phase being characterized somewhat arbitrarily by  $W_{LC} > 0.05$  (30). In contrast to  $W_g$ , this output has nonzero values for  $p_A \leq p_{A,c}$ . We wanted to compare the  $W_{LC}$  with the analytical expression for  $W_g$  in the region  $p_A > p_{A,c}$ . Fig. 3, A and B, shows that the values of  $W_{LC}$  at  $p_A < p_{A,c}$  are sensitive to the number of molecules chosen for the simulations. For  $m = 3$ ,  $p_{A,c} = 0.5$ , and the results for simulations using  $1 \times 10^3$  (green),  $5 \times 10^3$  (blue), and  $1 \times 10^4$  (red) molecules at  $p_A = p_{A,c}$  produce  $W_{LC} = 0.15 \pm 0.06$ ,  $0.09 \pm 0.05$ , and  $0.07 \pm 0.04$ , respectively. Similar results are obtained for  $m = 6$ , where  $p_{A,c} = 0.2$  (Fig. 3 B). Thus, the threshold of  $W_{LC} = 0.05$  is not a robust criterion for the prediction of  $p_{A,c}$ . Although the results for  $W_{LC}$  are sensitive to the number of molecules in the simulation in the region  $p_A \leq p_{A,c}$ , the three simulation sizes show that  $W_{LC}$  converges to  $W_g$  as  $p_A$  exceeds  $p_{A,c}$ .

It has been previously noted that in a nonreversible system with single molecule and site types, the occurrence of rings in the sol phase is negligible (13). Therefore, we felt that the occurrence of rings in the largest cluster might serve as a good criterion for the appearance of a gel phase. Indeed, our simulations show that rings consistently appear in the largest cluster whenever  $p_A > p_{A,c}$ . In Fig. 3 C, we show that this result is robust for the three simulation sizes and valencies  $m = 3$  and  $m = 6$ . For a linear or branched polymer (i.e., with no rings), the number of bonds is equal to the total number of monomers minus one; thus, for a large polymer or cluster, the ratio of bonds to monomers

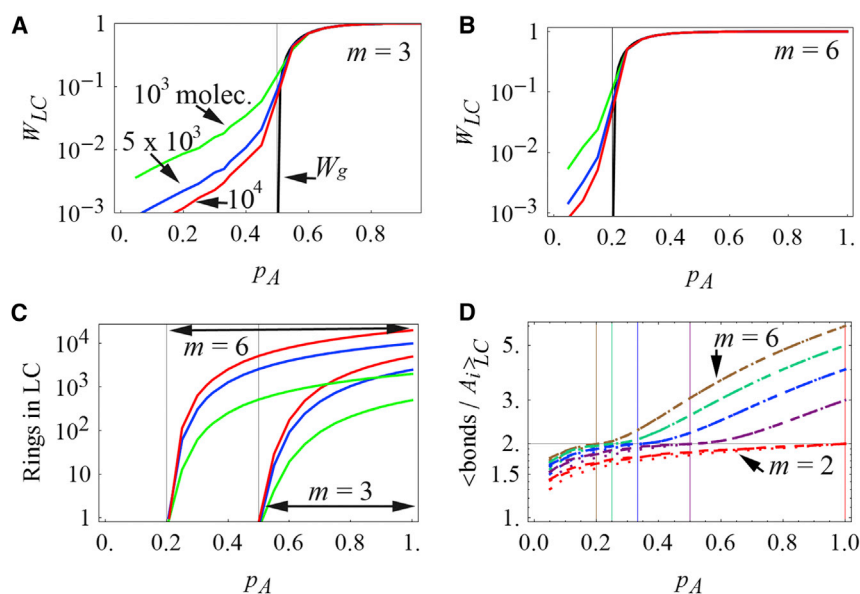

FIGURE 3 Properties of the largest cluster (LC) in a symmetric system consisting of an equal number of A and B molecules, each with valency  $m$ . (A and B) The weight fraction of the largest cluster,  $W_{LC}$ , where colored plots correspond to different numbers of molecules (green,  $10^3$  molecules; blue,  $5 \times 10^3$  molecules; and red,  $10^4$  molecules), and the weight fraction of the gel phase,  $W_g$ , from the analytical theory (9) (black lines). Molecules A and B have identical valency  $m = 3$  (A) or  $m = 6$  (B). The results of the simulations of  $W_{LC}$  converge toward the theory (black line) for  $p_A > p_{A,c}$ . (C) Appearance of rings in the largest cluster is abrupt at  $p_{A,c}$ , indicated by the lines at  $p_A = 0.2$  for valency  $m = 6$  and at  $p_A = 0.5$  for valency  $m = 3$ ; the color code is as in A and B. (D) Average number of bonds in each molecule A in the largest cluster. When this quantity is  $>2$ , there must be rings, and as in C, this condition is robustly met when  $p_A > p_{A,c}$ . Each color corresponds to a different valency,  $m = 6$  to  $m = 2$  from top to bottom (and left to right for  $p_{A,c}$ ). For each valency, simulations for  $10^3$ ,  $5 \times 10^3$ , and  $10^4$  molecules are plotted as dotted, dot-dashed, and dashed lines, respectively, and it is clear that the number of molecules does not significantly affect the results, especially past the  $p_{A,c}$ .

All results in A–D are the means of 50 simulations for systems with  $10^3$  and  $5 \times 10^3$  molecules, and 10 simulations for the system with  $10^4$  molecules. To see this figure in color, go online.

approaches 1 (or 2 if computing bonds/molecules of A, Fig. 3 D). Consistently, each molecule A that belongs to the largest cluster has an average of two bonds to B molecules at  $p_A = p_{A,c}$  (Fig. 3 D). When the number of bonds per A exceeds 2, a cluster must contain rings. Fig. 3 D therefore shows that this condition robustly predicts  $p_{A,c}$  for the three simulation sizes and valencies ranging from  $m = 2$  to  $m = 6$ . Physically, one would expect an increasingly stable gel phase with an increasing number of rings: the larger the number of rings the less likely that a single bond dissociation will result in fragmentation of the cluster. In addition, the occurrence of rings is rare in the region  $p_A < p_{A,c}$ . In fact, our solution coincides with the F-S expressions for distribution of cluster sizes in systems of branched polymers in the sol phase (Figs. S2 and S3).

We conclude that in systems where equal reactivity is applied consistently to both sol and gel phases, the occurrence of rings in the sol phase is negligible. Indeed, the occurrence of rings in the largest cluster can be used as a reliable indicator of the sol-gel transition for the numerical simulations (Fig. 3, C and D). In contrast, the fraction of molecules in the largest cluster is sensitive to the number of molecules in the simulation and does not, therefore, offer a robust criterion for prediction of the sol-gel transition (Fig. 3, A and B).

### Efficiency of the clustering algorithm

The computational cost of purely stochastic algorithms scales with the number of events. Therefore, no matter how coarsely a trajectory is ultimately sampled (including only once when a steady-state solution is all that is sought), the full trajectory of events must be simulated. Our method, on the other hand, randomly distributes a deterministically established fraction of bound sites assigned at each of a number of time points, predetermined as sufficient to characterize the system behavior. If a trajectory sampled at a series of discrete time points is sufficient for a simulation of multivalent kinetics, our method will be significantly more efficient than purely stochastic approaches. This is because our algorithm bypasses repeated stochastic dissociations and associations within the intervals between sampled time points; it establishes only the bonds that exist at the sampled times.

Solvers optimized for systems that do not allow rings have increased computational cost due to rejection of events as the system approaches the sol-gel transition (percolation threshold) (31). In contrast, Step 3 of our method was developed so that it is most efficient when the probability of bonds exceeds the percolation threshold. We use the system described in the previous section to illustrate the efficiency of the solver. In Fig. S4 we show that once the percolation threshold is met, the computational cost decreases exponentially with the valency of the system, for a fixed number of bonds. This computational advantage arises from the algo-

rithm described in Step 3, and because equal reactivity is consistently applied in both sol and gel phases, ring formation is allowed and no reactions are rejected.

### Analysis of an experimental PE system with cooperative synergistic interactions

Nck is an adaptor protein with both SH2 and SH3 domains that link, respectively, phosphotyrosine motifs on the cytoplasmic face of the plasma membrane to proline-rich motifs (PRMs) in actin-nucleation-promoting factors such as N-Wasp. In particular, the phosphotyrosines on nephrin in the membranes of kidney podocytes interact with Nck, which in turn recruits N-Wasp to organize the delicate foot processes that comprise the filtration barrier in the kidney (2). In addition to recruiting Nck to the membrane, tyrosine phosphorylation at multiple sites on nephrin may help promote the formation of nephrin-Nck-N-Wasp clusters. Because of the importance of this PE system, and because it has been characterized *in vitro* (1), we chose it to demonstrate the applicability of our algorithm to an experimental system.

The subject of this analysis is the recently published study of liquid-liquid demixing phase separation involving the multivalent domains of phosphorylated nephrin, Nck, and N-Wasp (1). Based on physical characterization of multivalent interactions of model systems, and on theoretical descriptions of multivalent polymers (20), it was postulated that these phase separations are accompanied by sol-gel transitions within the more concentrated of the two coexisting phases. Accordingly, we use the experimentally observable phase separation as an indicator of the sol-gel transition in this system. Nck SH3 domains interact with the important actin-nucleation promoter N-Wasp through the latter's PRM domains. Although affinities have not yet been reported in this system, analogies to other SH3-PRM systems suggest that they will have dissociation constant values on the order of tens to hundreds of micromolar.

First, we investigate the potential importance of a synergistic interaction to help explain the general shape of the sol-gel transition diagram for Nck and N-Wasp in the absence of nephrin. Multivalent molecules may be organized in supramodules, whereby the specific sequence of sites and linker domains may promote synergistic interactions (6) between a single binding site in one molecule and multiple domains in its binding partner. For example, it has been shown that a single PRM in Pak1 may interact with any one of the three SH3 domains of Nck. However, if both the second and third SH3 domains of Nck are present, a significantly stronger synergistic interaction between Nck and Pak1 occurs (27).

The Nck-N-Wasp interaction is modeled as an interaction between a molecule with three SH3 domains (SH3<sub>3</sub>) and a molecule with five PRMs (PRM<sub>5</sub>). The SH3<sub>3</sub> molecule is treated as cooperative. We label the SH3 domains as  $sI$ ,

$s_2$ , and  $s_3$ . The synergistic interaction is depicted by the arrow labeled (s) in Fig. 4 A and is represented as follows: if  $s_2$  establishes a bond with any one PRM, and  $s_3$  of the same molecule is free, the latter may cooperatively bind to the same PRM with binding and unbinding-rate constants  $k_{s+}$  and  $k_{s-}$ . To break the bond, both unbinding steps must occur. A similar sequence of reactions may occur if  $s_3$  establishes the first link. These interactions can be thought of as a two-stage binding. Alternatively, the  $s_2$  and  $s_3$  sites may establish two independent links to separate PRM domains (Fig. 4 A, (i)). In Fig. 4, B and C, we explore the impact of synergy strength by varying  $k_{s+}/k_{s-}$ . We use the occurrence of rings in the largest cluster (absolute number of molecules) as an indicator of the presence of a gel phase (Fig. S5 shows the fraction of SH3<sub>3</sub> and PRM<sub>5</sub> in the largest cluster). For a fixed pairwise affinity for the binding between a single SH3 domain and a PRM motif (arbitrarily set to  $K_D = 90 \mu\text{M}$ ), the ratio  $k_{s+}/k_{s-}$  tunes the shape of the sol-gel transition interface. When  $k_{s+}/k_{s-} \ll 1$  (i.e., synergy is negligible), the transition boundary overlaps with that predicted by the analytical F-S theory (Fig. 4 B, yellow curve), but the fit to the experimental data are poor. In contrast, increasing the value of  $k_{s+}/k_{s-}$  shifts the sol-gel transition interface toward higher concentrations of SH3<sub>3</sub> molecules. When  $k_{s+}/k_{s-} = 50$ , corresponding to a high degree of synergy, the shape of the predicted region of gel phase closely follows the pattern in the experimental data (Fig. 4 C).

We now turn our attention to the addition of a third component to the system, nephrin (Fig. 4, D–G). The interaction between Nck and nephrin occurs via the single SH2 domain of the former with the phosphorylated tyrosine (pY) domains of the latter, with affinity  $1 \mu\text{M}$  (2). By distributing  $9 \mu\text{M}$  of pY sites among bivalent molecules (pY<sub>2</sub>, as for rat nephrin; Fig. 4, D and E) or trivalent molecules (pY<sub>3</sub>, as for human or mouse nephrin; Fig. 4, F and G), the sol-gel transition interface is brought to much lower concentrations of SH3<sub>3</sub> and PRM<sub>5</sub> than in the absence of nephrin (Fig. 4, B and C), as shown both in our simulations and in experiments (note the different  $x$  and  $y$  scales in the plots of Fig. 4); the trivalent nephrin or pY<sub>3</sub> (Fig. 4, F and G) displays greater potency in promoting the gel phase than the bivalent nephrin or pY<sub>2</sub> (Fig. 4, D and E), as would be expected and as was found both in our simulations and in experiments (1). Thus, in vivo, multiple phosphorylations may be expected to do more than simply recruit Nck to the membrane-bound nephrin, but would also be expected to organize dense foci of N-Wasp-mediated actin-nucleation activity.

The two-component SH3<sub>3</sub>-PRM<sub>5</sub> system shows that the synergistic interaction reduces the region of concentrations where the gel phase can occur (compare Fig. 4, B and C). However the opposite trend occurs when the pY<sub>2</sub> or pY<sub>3</sub> scaffolding molecules are added (Fig. 4, D–G). This behavior likely reflects the tradeoff, for the synergistic interaction, between increased effective affinity and

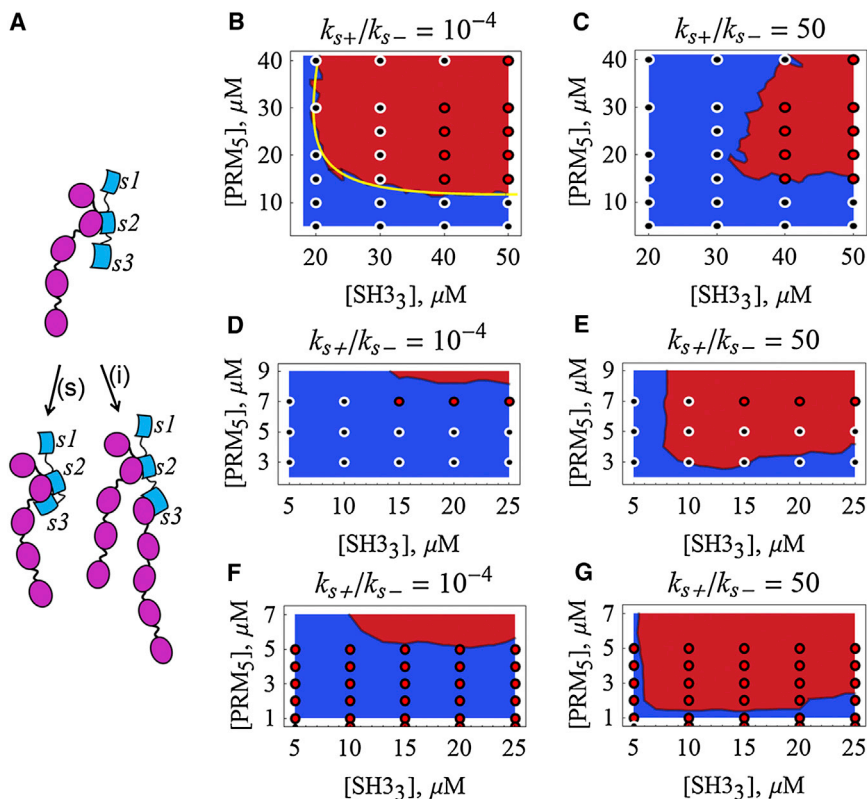

FIGURE 4 Impact of synergistic interactions in sol-gel transition diagrams. (A) The second and third SH3 domains of Nck may act independently (i) or synergistically (s). Sol-gel transition diagrams for systems with trivalent molecule SH3<sub>3</sub> (of Nck) binding to pentavalent molecule PRM<sub>5</sub> (of N-Wasp), without (B and C) or with (D–G) the inclusion of Nck binding to nephrin. Plots in D–G are simulated with  $9 \mu\text{M}$  of phosphorylated tyrosine sites distributed among bivalent (D and E) or trivalent (F and G) molecules. The intensity of the synergistic interaction between the last two SH3 domains is represented by the ratio  $k_{s+}/k_{s-}$ . The results shown are averages of 20 simulations for each condition, with 50 molecules/ $\mu\text{M}$  (B and C) or 250 molecules/ $\mu\text{M}$  (D–G). The occurrence of rings in the largest cluster is used to identify the occurrence of a gel phase. Experimental data for Nck and N-Wasp are represented by the circles (red, gel phase present; black, gel phase absent) (1). The yellow line in B corresponds to the F-S theoretical prediction when  $k_{s+} = 0$ . To see this figure in color, go online.

decreased valency, because one strong cooperative interaction uses up two SH3 domains. For the two-component system of Fig. 4 C, the decreased valency of the synergistic interaction dominates and the gel region shrinks compared to its size in Fig. 4 B. The addition of pY<sub>2</sub> or pY<sub>3</sub> to the system effectively boosts the valency of the overall system so that this factor is no longer limiting; thus, in Fig. 4, D–G, increased affinity is most important, producing a dramatic increase in the size of the gel region when synergy is included in the simulations. Consistently, the synergy increases the percentage of SH3<sub>3</sub> molecules that are bound and the stoichiometry (SH3<sub>3</sub>/PRM<sub>5</sub>) of the largest cluster (Figs. S6 and S7).

Although the trends predicted by the models follow the trends in experiments, the simulations in Fig. 4, C, E, and G, are not perfect reproductions of the experiment. The lack of precise agreement with experiment may reflect our use of estimates for the relevant affinities. We did not attempt an extensive parameter search over a range of reasonable values of affinities or  $k_{s+}/k_{s-}$ . Furthermore, additional cooperative or synergistic interactions may need to be considered. It is also possible that these discrepancies arise from the limitations of the algorithm. However, this analysis points to the importance of cooperative synergistic interactions and the complex interplay between valency and affinity in this important PE system.

## DISCUSSION

Multimolecular weak-affinity multivalent interactions are ubiquitous in cell biological systems and can lead to formation of PEs within the cytoplasm (1,3,4,8,33,34). However, these interactions are difficult to model and analyze because of the combinatorial explosion of the possible number of states and species (8). Such interactions have been successfully treated with fully stochastic network-free particle-based methods (25,26), which probabilistically assign binding or unbinding events in a complete trajectory for the assembly of PEs. In this work, we describe a multistep hybrid deterministic/stochastic approach toward predicting the size, composition, and assembly kinetics of PEs. To do so, we compute the properties of the ensemble of binding sites rather than the kinetic details of a single trajectory. We make use of the concept, first demonstrated over 50 years ago by F-S theory, that the fractions of occupied binding sites determine cluster-size distribution. Thus, by building on the F-S theory, we can avoid using a purely stochastic particle-based method. Instead, we deterministically compute the fractional site occupancy for each time point, and then stochastically distribute the bonds between molecules containing the multivalent binding sites. For purely stochastic simulations, every binding and unbinding event must be traversed during a dynamic simulation to generate a complete trajectory; this is true even when only the

steady-state properties of the PE are desired. For our algorithm, the deterministic step precalculates the probability of a site being occupied at each point in time, thus dramatically improving simulation efficiency; for steady-state properties, it suffices to determine only a single set of site occupancies calculated from the binding-site concentrations and affinities. The same concept may be extended to systems with cooperativity, as validated against numerical simulations performed with existing fully stochastic software tools (25,26) (Fig. 2).

The advantage of our numerical method, in comparison to the F-S theory, is that it can handle more than two types of binding site and more than two molecule types. Furthermore, here, for the first time that we know of, the idea of tracking the fraction of cooperative molecules in each state (15) is applied toward improving a computational method. Our method also overcomes the limitations (9,10,19) of F-S analytical theory by permitting a full treatment of ring formation (i.e., intracuster reactions) in both sol and gel phases. The same binding-rate constants are consistently applied in both the sol and gel phases, allowing intramolecular reactions. We show that rings are indeed rare within the sol phase, permitting us to use the occurrence of rings in the largest cluster to indicate that the system has reached the sol-gel transition (Fig. 3).

A higher level of accuracy can be achieved with methods that consider each molecule to be a space-filling object that diffuses and interacts with its binding partners in 3D space. Although such methods are important to assess the applicability of the theory to specific problems (22,23), the computational cost can be immense. For example, with our algorithm all the simulations used to generate the plots in Figs. 3, S2, and S3 were completed within a few hours. In contrast, a similar system with 1000 molecules computed using a spatial Monte Carlo method in 3D may require months of computer time (22,23). Three assumptions of our method are: 1), as with any nonspatial approach, the binding rates are taken to be lower than the diffusion limit; 2), for a given binding-site pair, intracuster reactions have the same binding-rate constants as intermolecular reactions; and 3), cooperative (or synergistic) molecules must interact with equal-reactivity sites. In comparison with the available nonspatial software, our method can be more efficient than time-resolved stochastic particle-based simulations, treats high valencies with simplicity, and is well suited for computation of ring formation.

A wide range of biologically relevant systems are consistent with these assumptions (1,5,6,35). Indeed, this modeling approach was designed for systems that we have called PEs (8) to denote assemblies of multivalent monomers driven by relatively weak binding interactions. These PEs are characterized by a distribution of stoichiometries and sizes. They are thus distinguished from the



stoichiometric molecular assemblies that we have termed machines; these have a fixed composition and size and are characterized by strong, often highly cooperative, interactions between their subunit components. Ribosomes, viruses, flagella, the proteasome, and nuclear pores are all structures that would fall into this category.

We applied our algorithm to an experimental system consisting of interactions within a trimolecular PE consisting of nephrin, Nck, and N-Wasp. Nephrin has up to three binding sites for a single binding site on Nck; Nck has three additional binding sites that can bind up to five sites on N-Wasp. Fig. 4 shows that when we invoked cooperative synergistic interactions between the Nck SH3 domains and the PRMs on N-Wasp, we were able to reproduce the general shape of the experimentally reported (1) liquid-liquid demixing phase diagrams (which we use as a proxy for the sol-gel transition). The simulations also produced a substantial decrease in critical concentration when multiply phosphorylated nephrin was included in the system, also consistent with experiment. This analysis highlights the impact of the previously established synergistic interactions between the Nck SH3 domains and PRM binding partners (27) on the sol-gel transition diagram. The synergy results in an apparent reduction of valency, and the region of the diagram where the gel phase occurs is reduced for the bimolecular system. However, upon addition of the bivalent or trivalent nephrin, the synergistic interaction promotes gelation for lower Nck and N-Wasp concentrations than in a corresponding equal-reactivity system. This analysis demonstrates how both the shape and region of the sol-gel transition interface can be used to help elucidate the details of interactions between multivalent molecules.

## CONCLUSIONS

We have described a novel (to our knowledge) and efficient method, built on classical polymer theory, for modeling the properties of PEs. It is not appropriate for modeling the assembly of stoichiometric molecular machines. Our method directly addresses the combinatorial complexity of the multivalent interactions underlying PEs, which has been a major challenge to previous modeling approaches. The utility of this method was exemplified by application to a signaling system that reveals the importance of cooperative synergistic interactions in controlling PE composition and size. This system also demonstrates how signaling through tyrosine phosphorylation and multidomain adaptor proteins can potentiate the production of large clusters of actin-nucleation promotion factors such as N-Wasp. We believe this approach can be directly applied for the modeling and analysis of cellular PEs such as signaling platforms, nucleoprotein particles, lipid rafts, and cell-cell or cell-matrix contacts.

## SUPPORTING MATERIAL

Seven figures, input files for KaSim and RuleMonkey, and details of the theory are available at [http://www.biophysj.org/biophysj/supplemental/S0006-3495\(13\)01147-8](http://www.biophysj.org/biophysj/supplemental/S0006-3495(13)01147-8).

The authors thank Michael Rosen, Sudeep Banjade, and Soyeon Kim at University of Texas Southwestern for the discussions regarding the nephrin-Nck-N-Wasp system. We also thank Michael Rosen for his critical reading of an early version of the manuscript.

This work was supported by National Institutes of Health grants TRO1DK087650, R01HL097431, P41GM103313, and R01GM095485.

## REFERENCES

- Li, P., S. Banjade, ..., M. K. Rosen. 2012. Phase transitions in the assembly of multivalent signalling proteins. *Nature*. 483:336–340.
- Jones, N., I. M. Blasutig, ..., T. Pawson. 2006. Nck adaptor proteins link nephrin to the actin cytoskeleton of kidney podocytes. *Nature*. 440:818–823.
- Brangwynne, C. P., C. R. Eckmann, ..., A. A. Hyman. 2009. Germline P granules are liquid droplets that localize by controlled dissolution/condensation. *Science*. 324:1729–1732.
- Carson, J. H., Y. Gao, ..., E. Barbarese. 2008. Multiplexed RNA trafficking in oligodendrocytes and neurons. *Biochim. Biophys. Acta*. 1779:453–458.
- Schiller, H. B., and R. Fässler. 2013. Mechanosensitivity and compositional dynamics of cell-matrix adhesions. *EMBO Rep*. 14:509–519.
- Feng, W., and M. Zhang. 2009. Organization and dynamics of PDZ-domain-related supramodules in the postsynaptic density. *Nat. Rev. Neurosci*. 10:87–99.
- Goldstein, B., and A. S. Perelson. 1984. Equilibrium theory for the clustering of bivalent cell surface receptors by trivalent ligands. Application to histamine release from basophils. *Biophys. J*. 45:1109–1123.
- Mayer, B. J., M. L. Blinov, and L. M. Loew. 2009. Molecular machines or pleiomorphic ensembles: signaling complexes revisited. *J. Biol.* 8:81.
- Flory, P. J. 1953. Principles of Polymer Chemistry. Cornell University Press, Ithaca, NY.
- Stockmayer, W. H. 1943. Theory of molecular size distribution and gel formation in branched-chain polymers. *J. Chem. Phys.* 11:45–55.
- Cohen, R. J., and G. B. Benedek. 1982. Equilibrium and kinetic theory of polymerization and the sol-gel transition. *J. Phys. Chem.* 86:3696–3714.
- Perelson, A. S., and B. Goldstein. 1985. The equilibrium aggregate size distribution of self-associating trivalent molecules. *Macromolecules*. 18:1588–1597.
- Falk, M., and R. E. Thomas. 1974. Molecular size distribution in random polyfunctional condensation with or without ring formation: computer simulation. *Can. J. Chem.* 52:3285–3295.
- Goldstein, B., J. R. Faeder, and W. S. Hlavacek. 2004. Mathematical and computational models of immune-receptor signalling. *Nat. Rev. Immunol.* 4:445–456.
- Perelson, A. S., C. DeLisi, and F. W. Wiegel. 1984. Cell Surface Dynamics: Concepts and Models. Marcel Dekker, New York.
- Markova, O., J. Alberts, ..., P. F. Lenne. 2012. Bond flexibility and low valence promote finite clusters of self-aggregating particles. *Phys. Rev. Lett.* 109:078101.
- Stockmayer, W. H. 1952. Molecular distribution in condensation polymers. *J. Polym. Sci.* 9:69–71.
- Sciortino, F., and E. Zaccarelli. 2011. Reversible gels of patchy particles. *Curr. Opin. Solid State Mater. Sci.* 15:246–253.
- Rubinstein, M., and R. H. Colby. 2003. Polymer Physics. Oxford University Press, New York.

20. Semenov, A., and M. Rubinstein. 1998. Thermoreversible gelation in solutions of associative polymers. 1. Statics. *Macromolecules*. 31:1373–1385.
21. Bianchi, E., P. Tartaglia, ..., F. Sciortino. 2007. Fully solvable equilibrium self-assembly process: fine-tuning the clusters size and the connectivity in patchy particle systems. *J. Phys. Chem. B*. 111: 11765–11769.
22. Russo, J., P. Tartaglia, and F. Sciortino. 2009. Reversible gels of patchy particles: role of the valence. *J. Chem. Phys.* 131:014504.
23. Tavares, J. M., P. I. Teixeira, ..., F. Sciortino. 2010. Equilibrium self-assembly of colloids with distinct interaction sites: thermodynamics, percolation, and cluster distribution functions. *J. Chem. Phys.* 132: 234502.
24. Sneddon, M. W., J. R. Faeder, and T. Emonet. 2011. Efficient modeling, simulation and coarse-graining of biological complexity with NFsim. *Nat. Methods*. 8:177–183.
25. Feret, J., V. Danos, ..., W. Fontana. 2009. Internal coarse-graining of molecular systems. *Proc. Natl. Acad. Sci. USA*. 106:6453–6458.
26. Colvin, J., M. I. Monine, ..., R. G. Posner. 2010. RuleMonkey: software for stochastic simulation of rule-based models. *BMC Bioinformatics*. 11:404.
27. Bokoch, G. M., Y. Wang, ..., U. G. Knaus. 1996. Interaction of the Nck adapter protein with p21-activated kinase (PAK1). *J. Biol. Chem.* 271:25746–25749.
28. Faeder, J. R., M. L. Blinov, and W. S. Hlavacek. 2009. Rule-based modeling of biochemical systems with BioNetGen. *Methods Mol. Biol.* 500:113–167.
29. Wyman, J., and S. J. Gill. 1990. Binding and Linkage: Functional Chemistry of Biological Macromolecules. University Science Books, Mill Valley, CA.
30. Yang, J., M. I. Monine, ..., W. S. Hlavacek. 2008. Kinetic Monte Carlo method for rule-based modeling of biochemical networks. *Phys. Rev. E Stat. Nonlin. Soft Matter Phys.* 78:031910.
31. Yang, J., and W. S. Hlavacek. 2011. The efficiency of reactant site sampling in network-free simulation of rule-based models for biochemical systems. *Phys. Biol.* 8:055009.
32. Monine, M. I., R. G. Posner, ..., W. S. Hlavacek. 2010. Modeling multivalent ligand-receptor interactions with steric constraints on configurations of cell-surface receptor aggregates. *Biophys. J.* 98:48–56.
33. Wippich, F., B. Bodenmiller, ..., L. Pelkmans. 2013. Dual specificity kinase DYRK3 couples stress granule condensation/dissolution to mTORC1 signaling. *Cell*. 152:791–805.
34. Shen, T. H., H. K. Lin, ..., P. P. Pandolfi. 2006. The mechanisms of PML-nuclear body formation. *Mol. Cell*. 24:331–339.
35. Kato, M., T. W. Han, ..., S. L. McKnight. 2012. Cell-free formation of RNA granules: low complexity sequence domains form dynamic fibers within hydrogels. *Cell*. 149:753–767.

## Supporting Material

### **Pleomorphic ensembles: formation of large clusters composed of weakly interacting multivalent molecules**

**Authors:** C. V. Falkenberg<sup>1\*</sup>, M. L. Blinov<sup>1</sup>, L. M. Loew<sup>1\*</sup>

#### **Affiliations:**

<sup>1</sup> Richard D. Berlin Center for Cell Analysis and Modeling, University of Connecticut Health Center, Farmington, Connecticut, United States of America.

#### Supplementary Text

Fig. S1. Clustering algorithm.

Fig. S2. Mole fraction for x-mers.

Fig. S3. Impact of simulation size and number of simulations in the cluster size distribution when  $p_A < p_{A,c}$ .

Fig. S4. Computational cost as a function of number of bonds and valency.

Fig. S5. Properties of the largest cluster for the trivalent SH3<sub>3</sub> and pentavalent PRM<sub>5</sub> system.

Fig. S6. Percentage of SH3<sub>3</sub> that is bound.

Fig. S7. Stoichiometry of the largest cluster.

Codes for results in Fig.2.

The classical F-S theory:

The theory is described in greater detail in (1-4). Below we list the equations relevant to this manuscript.

Mole fraction,  $M_{fx}$ , of  $x$ -mers formed by  $x$  monomers “A” according to Flory-Stockmayer theory:

$$M_{fx} = \frac{N_x}{N_0(1 - p_A m/2)}$$

Where

$$N_x = N_0 \frac{m(m-x)!}{(m-x+2)! x!} p_A^{x-1} (1-p_A)^{m-x+2}$$

Where  $N_0$  is the total number of monomeric units of “A” in the system. Each monomeric unit has valency  $m$ . The same expressions are valid for ‘symmetric systems’ with identical number of molecules A and B, each with valency  $m$ . In this case, each site in any molecule A can only bind to sites in molecules type B. The equation for the identification of critical degree of reaction, or percolation threshold, to reach the sol-gel transition in a symmetric equal reactivity system is:

$$p_{A,c} = (m-1)^{-1}$$

The equation for the identification of the sol-gel transition in asymmetric equal reactivity systems (2), with valencies  $m$  and  $n$  for A and B, respectively:

$$(p_A p_B)_{gel} = (m-1)^{-1} (n-1)^{-1}$$

The critical degree of reaction is valid for both kinetic or equilibrium systems. The critical concentration for reaching the sol-gel transition corresponds to  $p_A(t=\infty) = p_{A,c}$  for the symmetric system. The critical pair of concentrations is identified by the product  $p_A(t=\infty) p_B(t=\infty) = (p_A p_B)_{gel}$  for the asymmetric system.

Given the concentrations  $c_A$  and  $c_B$  of molecules **A** and **B** respectively, the corresponding valencies  $m$  and  $n$ , and the binding and unbinding rate constants  $k_+$  and  $k_-$ , the critical concentrations are identified by applying the equilibrium condition to the system of equations below. We first define the probabilities of bond for each site type:

$$p_A(t) = \frac{s_{A,b}(t)}{s_{A,b}(t) + s_{A,f}(t)}$$

$$p_B(t) = \frac{s_{B,b}(t)}{s_{B,b}(t) + s_{B,f}(t)}$$

Where the time dependent variables  $s_{A,f}$ ,  $s_{A,b}$ ,  $s_{B,f}$ ,  $s_{B,b}$  represent the concentrations of sites type A that are free and bound, and concentration of sites type B that are free and bound, respectively.



All variables are identified by conservation of mass:

$$s_{A,b}(t) = s_{B,b}(t)$$

$$s_{A,b}(t) + s_{A,f}(t) = m c_A$$

$$s_{B,b}(t) + s_{B,f}(t) = n c_B$$

$$s_{A,f}(t) = m c_A - s_{A,b}(t)$$

$$s_{B,f}(t) = n c_B - s_{B,b}(t)$$

$$\frac{\partial s_{A,f}(t)}{\partial t} = -\frac{\partial s_{A,b}(t)}{\partial t} = \frac{\partial s_{B,f}(t)}{\partial t} = -\frac{\partial s_{B,b}(t)}{\partial t}$$

$$\frac{\partial s_{A,b}(t)}{\partial t} = k_+ s_{A,f}(t) s_{B,f}(t) - k_- s_{A,b}(t)$$

For the convenience of scientific community, we have implemented the classic F-S equations for prediction of equilibrium sol-gel transition diagrams in an openly accessible web based tool at <http://vcell.org/SimGel/>. But it should be noted that this tool does not implement the new algorithm which is the primary subject of this paper.

## Clustering Algorithm

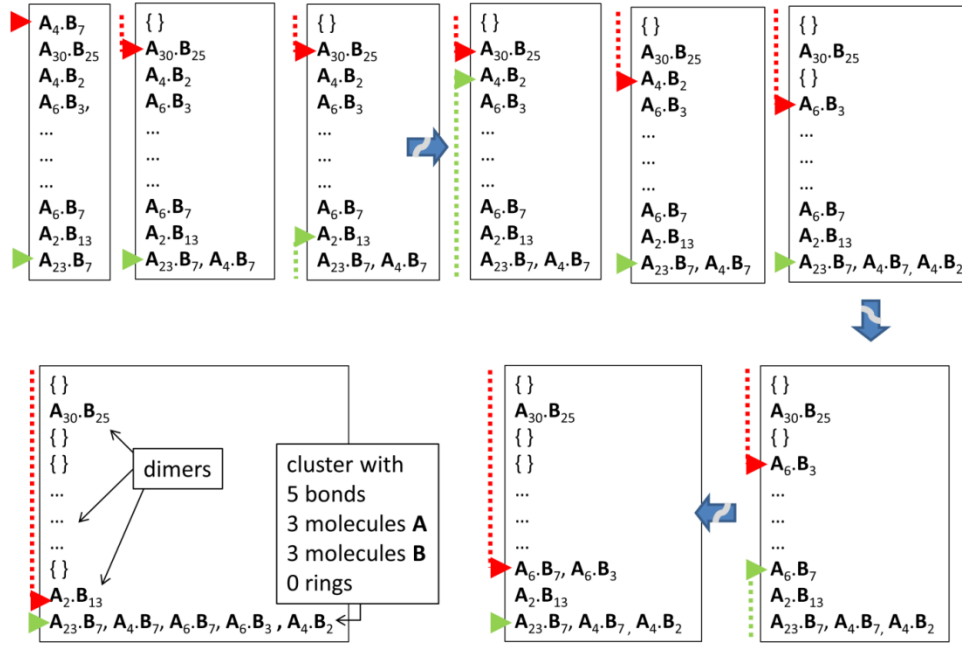

FIGURE S1 Clustering algorithm. Each box in this illustrative example represents the vector of bonds at consecutive iterative steps (clockwise). At each step, the elements of the vector identified by the arrowheads are compared. The bottom arrowhead (green) moves upwards until there is a common molecule in both elements, or it reaches the position of the upper arrowhead (red). If the first test is true, bonds from the element marked by the upper arrowhead are added to the element marked by the lower arrowhead (first step). Large broken blue arrows indicate that intermediate steps are omitted.

The ODE's for TLBR system:

$$\frac{\partial L_1}{\partial t} = 3 k_{1+} L_0 sR - k_- L_1 - 2 k_{2+} L_1 sR + 2 k_- L_2$$

$$\frac{\partial L_2}{\partial t} = 2 k_{2+} L_1 sR - 2 k_- L_2 - k_{2+} L_2 sR + 3 k_- L_3$$

$$\frac{\partial L_3}{\partial t} = k_{2+} L_2 sR - 3 k_- L_3$$

Where  $L_1$  represents the concentration of ligands with 1 bonds, and conservation of mass dictates that the total concentration of ligands  $c_L = L_0 + L_1 + L_2 + L_3$ . The fractions  $\rho_{L,1}$  are the ratios between the concentrations of ligands with 1 bonds and the total ligand concentration:

$$\rho_{L,l} = \frac{L_l}{c_L}, \quad l=0,\dots,3$$

The total concentration of receptors is  $c_R$  and the concentration of free receptor sites  $sR$  is obtained from the conservation of mass:

$$sR = 2 c_R - c_L \sum_{l=1}^3 (l \rho_{L,l})$$

### Comparisson of the model with F-S theory

Using our method (Fig.S2), we compared our simulation results with both the analytical solutions and numerical solutions from (4). All three solutions agree up to  $p_{A,c}$ , which is shown with a vertical line (solid arrowhead). This is consistent with the Falk and Thomas derivations that in a system with a large number of molecules the probability of occurrence of rings is negligible when  $p_A < p_{A,c}$ .

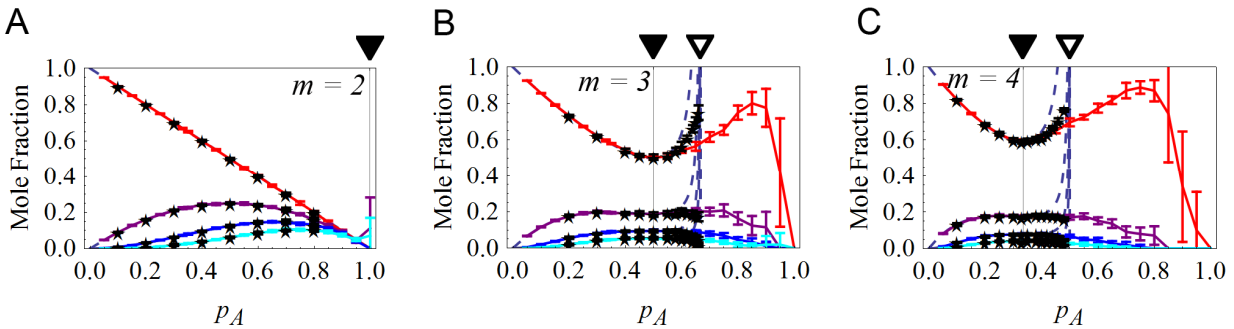

FIGURE S2 Mole fraction for  $x$ -mers (curves from top to bottom,  $x=1$  to  $x=4$ ) for systems with two to four binding sites ( $m=2$  to  $m=4$ ). Dashed line: analytical solution for mole fraction (3); stars: numerical solution for rings forbidden model (4); solid lines: Hybrid method solution. Each point corresponds to the mean of ten simulations of a symmetric system with 10,000 molecules total. Arrowheads indicate  $p_{A,c}$  (solid) and  $p_{A,max}$  (open).

### Simulation size vs. theory

We compare the simulations and theory over the full range of numerically occurring clusters sizes. In Fig. S3 A-B the results of several simulations are superposed. The lower bound for each mole fraction as a function of simulation size (and  $m$  and  $p_A$ ) is explicit: simulations with larger number of molecules are able to populate a wider range of cluster sizes, which occur at lower frequency. The averaged results over the several simulations are showed in Fig. S3 C-D. Our simulations report slightly higher mean frequency of large clusters than the theory. Similar observations were reported by Sciorino and colleagues when using a Monte Carlo method for 3D systems with 1000 molecules (5). In that study, Flory's theory was compared to systems with combinations of molecules of valencies 2 and 3, and deviations were attributed to a higher mean

valency of the system (larger fraction of trivalent molecules). Here we show that for our model, the agreement between the theory and the numerical solution can be maintained over a wider range of cluster sizes by increasing the size of the system (fivefold increase in size in blue vs. green curves in Fig.S3C-D) or the number of independent simulations used for the averaging (fivefold increase in blue vs. red). The results are consistent for both valencies 2 and 3.

Note that in computational models (or systems with limited number of molecules) the lower bound for the value of the mole fraction in each time point is the inverse of the system size. Consequently, the cluster size distribution is sensitive to the total number of molecules in the system, with greater impact on clusters of lower frequency. It is important to keep in mind that the simulation results are sensitive to the system size as  $p_A$  approaches  $p_{A,c}$ . Meaning, that if the biological system of interest lies on this region, and is composed by an infinitely large number of molecules, the absolute value of the largest cluster in the simulation cannot be trusted. However, for biological systems with a limited number of molecules, the stochastic numerical results may represent a better solution than the analytical theory.

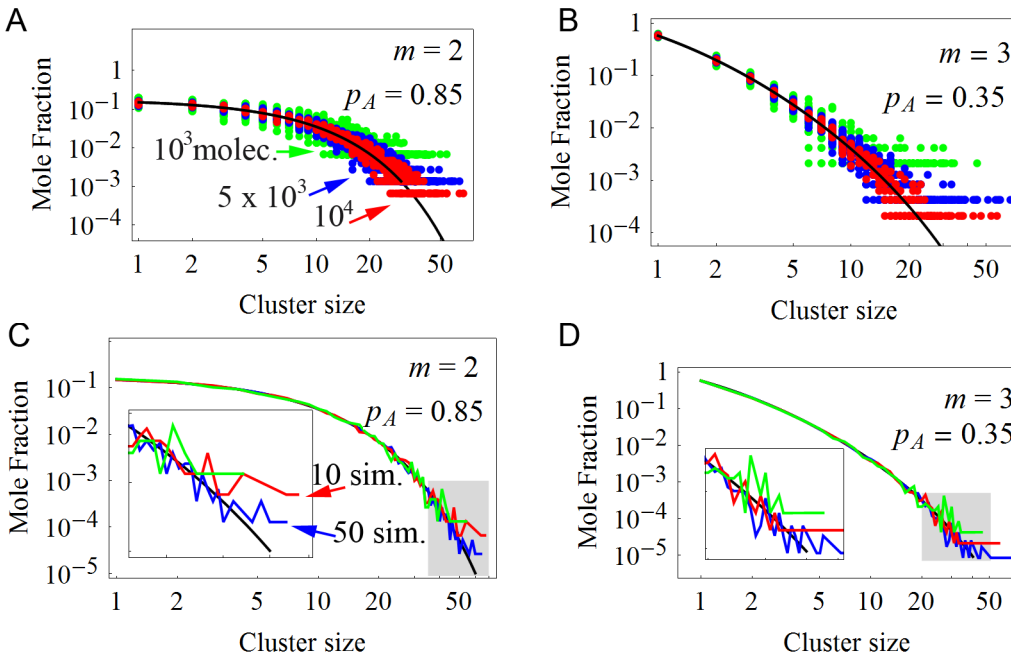

FIGURE S3 Impact of simulation size and number of simulations in the cluster size distribution when  $p_A < p_{A,c}$ . A-B. Superposition of results for all 10, 50 and 50 simulations with 10000 molecules (red), 5000 (blue) and 1000 (green) molecules, respectively. C-D. Corresponding mean values. Solid black line: analytical solution. Insets correspond to regions in the gray box. A and C, valency  $m=2$ . B and D, valency  $m=3$ .

### Efficiency of the clustering algorithm

The Step 3 of our method was developed so that it is most efficient when the probability of bonds exceeds the percolation threshold. This step is the heaviest part of the algorithm. The



molecules present in each bond will be sequentially compared to the other objects in the list of bonds up to the point when both objects share a common molecule. In a system of monovalent molecules, the largest possible cluster is a dimer and the computational cost scales with the square of the total number of bonds. On the other extreme, systems with high valency and with  $p_A > p_{A,c}$ , every time a new object is picked from the list of bonds, there is a significant chance that the molecules belonging to this object will also be present in a previously identified cluster. If that is the case, a smaller number of comparisons are necessary.

We use the system with two  $m$ -valent molecule types, **A** and **B**, discussed in the manuscript's section "The occurrence of rings in the largest cluster robustly identifies the sol-gel transition" to illustrate the efficiency of the solver. In Fig.S4 we show that once the percolation threshold is met, the computational cost decreases exponentially with the valency of the system. This reduction is the explicit numerical advantage of the assumption that ring formation in the gel phase obeys the exact same rules in both sol and gel phases, therefore no reactions are rejected.

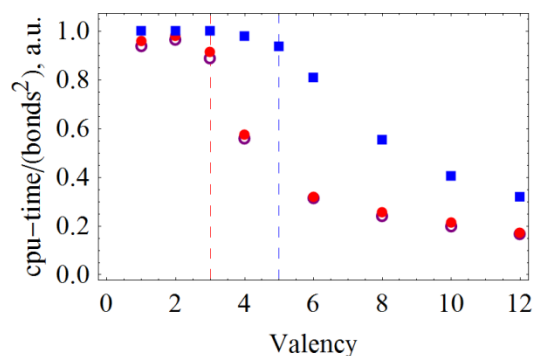

FIGURE S4 Computational cost as a function of number of bonds and valency. The simulation cost scales with the square of the total number of bonds. The ratio  $\text{cpu-time}/(\text{bonds}^2)$  is equivalent for two systems with  $p_A=0.5$  and concentrations 12000 molecules/valency (open circle) or 6000 molecules/valency (solid circles).  $p_A=0.5$  corresponds to the percolation threshold for valency  $m=3$ . The solid squares represent the computational cost for simulations with 12000 molecules/valency and  $p_A=0.25$ , which matches the percolation threshold for  $m=5$ .

*Sol-Gel transition for SH3<sub>3</sub> and PRM<sub>5</sub> system and the properties of the largest cluster*

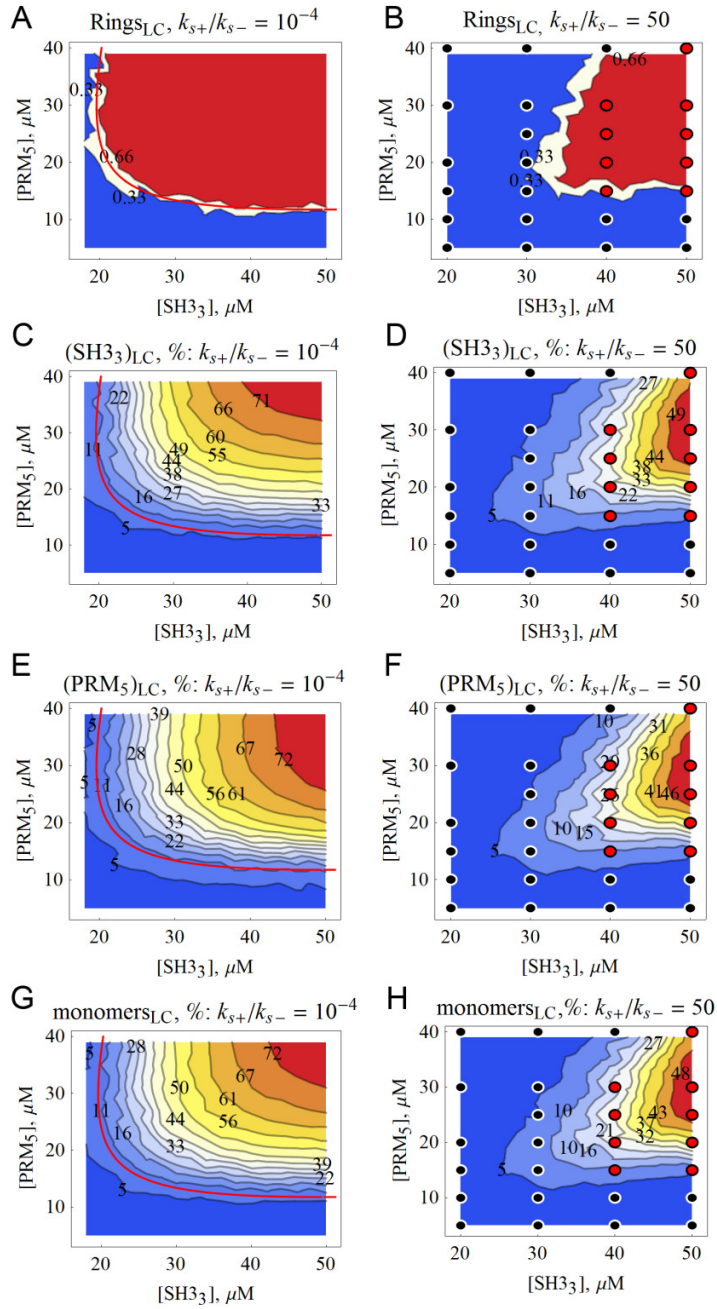

FIGURE S5 Properties of the largest cluster for the trivalent SH3<sub>3</sub> and pentavalent PRM<sub>5</sub> system.

The average number of rings in the largest cluster (A) is the most robust predictor of the theoretical sol-gel transition interface (red line). The fraction of SH3<sub>3</sub> molecules (C), PRM<sub>5</sub> molecules (D) and of all molecules (G) that belong to the largest cluster ranges from 5-11% at the interception with the theoretical curve. B, D, F and H correspond to the same outputs for high synergistic interaction ( $k_{s+}/k_{s-} = 50$ ), superposed with the experimental results from (6).

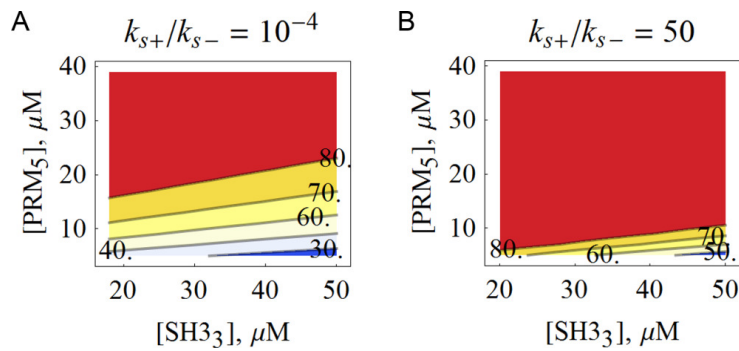

FIGURE S6 Percentage of SH3<sub>3</sub> that is bound. Includes small and large clusters, for a system with SH3<sub>3</sub> and PRM<sub>5</sub> only. A strong synergistic interaction (B) dramatically reduces the fraction of free monomeric SH3<sub>3</sub> in comparison to a system subject to ‘equal reactivity’ (A).

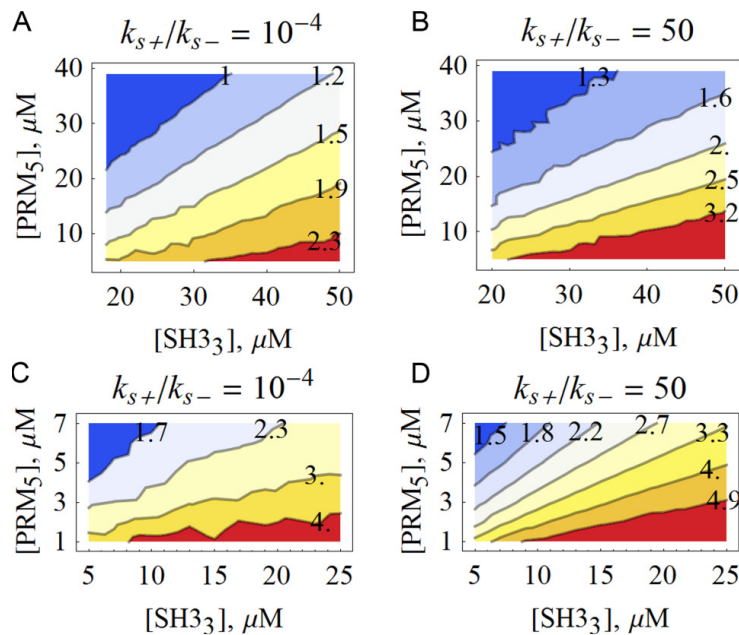

FIGURE S7 Stoichiometry of the largest cluster. Ratio between number of molecules SH3<sub>3</sub>/PRM<sub>5</sub> in the largest cluster for a system with SH3<sub>3</sub> and PRM<sub>5</sub> only (A-B) and with addition of 3 μM of pY<sub>3</sub> (C-D).

The contour plots in Figs.4 and Figs.S5-S7 were generated using 1<sup>st</sup> order interpolation of the means of 20 simulations per concentration pair. Concentration intervals consist of 2 μM for systems with SH3<sub>3</sub> and PRM<sub>5</sub> only (Fig. 4B-C, Fig.S5-S6 and Fig.S7A-B. Concentration intervals consist of 1 μM for PRM<sub>5</sub> concentrations and 2 μM for SH3<sub>3</sub> concentrations for Fig.4D-G and Fig.S7C-D.

## Supporting References

1. Stockmayer, W. H. 1943. Theory of molecular size distribution and gel formation in branched-chain polymers. *The journal of chemical physics*. 45-55.
2. Stockmayer, W. H. 1952. Molecular distribution in condensation polymers. *Journal of Polymer Science* 9:69-71.
3. Flory, P. J. 1953. *Principles of polymer chemistry*. Cornell University Press, Ithaca.
4. Falk, M., and R. E. Thomas. 1974. Molecular Size Distribution in Random Polyfunctional Condensation with or without Ring Formation: Computer Simulation. *Canadian Journal of Chemistry* 52:3285-3295.
5. Russo, J., P. Tartaglia, and F. Sciortino. 2009. Reversible gels of patchy particles: Role of the valence. *Journal of Chemical Physics* 131.
6. Li, P., S. Banjade, H. C. Cheng, S. Kim, B. Chen, L. Guo, M. Llaguno, J. V. Hollingsworth, D. S. King, S. F. Banani, P. S. Russo, Q. X. Jiang, B. T. Nixon, and M. K. Rosen. 2012. Phase transitions in the assembly of multivalent signalling proteins. *Nature* 483:336-340.



```
#####  
## code used to run TLBR using kappa/kasim  
#####
```

```
### Signatures
```

```
%agent: A(x1,x2,x3) # Declaration of ligand  
%agent: B(x1,x2) # Declaration of receptor
```

```
### Rules - first binding
```

```
'a.b11' A(x1,x2,x3),B(x1) -> A(x1!1,x2,x3),B(x1!1) @ 'on_rate' #A binds B  
'a..b11' A(x1!1,x2,x3),B(x1!1) -> A(x1,x2,x3),B(x1) @ 'off_rate' #AB dissociation  
  
'a.b12' A(x1,x2,x3),B(x2) -> A(x1!1,x2,x3),B(x2!1) @ 'on_rate' #A binds B  
'a..b12' A(x1!1,x2,x3),B(x2!1) -> A(x1,x2,x3),B(x2) @ 'off_rate' #AB dissociation  
  
'a.b21' A(x2,x1,x3),B(x1) -> A(x2!1,x1,x3),B(x1!1) @ 'on_rate' #A binds B  
'a..b21' A(x2!1,x1,x3),B(x1!1) -> A(x2,x1,x3),B(x1) @ 'off_rate' #AB dissociation  
  
'a.b22' A(x2,x1,x3),B(x2) -> A(x2!1,x1,x3),B(x2!1) @ 'on_rate' #A binds B  
'a..b22' A(x2!1,x1,x3),B(x2!1) -> A(x2,x1,x3),B(x2) @ 'off_rate' #AB dissociation  
  
'a.b31' A(x3,x1,x2),B(x1) -> A(x3!1,x1,x2),B(x1!1) @ 'on_rate' #A binds B  
'a..b31' A(x3!1,x1,x2),B(x1!1) -> A(x3,x1,x2),B(x1) @ 'off_rate' #AB dissociation  
  
'a.b32' A(x3,x1,x2),B(x2) -> A(x3!1,x1,x2),B(x2!1) @ 'on_rate' #A binds B  
'a..b32' A(x3!1,x1,x2),B(x2!1) -> A(x3,x1,x2),B(x2) @ 'off_rate' #AB dissociation
```

```
### Rules - NEXT binding
```

```
'a.b11n1' A(x1,x2!_,x3),B(x1) -> A(x1!1,x2!_,x3),B(x1!1) @ 'on_rate2' #A binds B  
'a..b11n1' A(x1!1,x2!_,x3),B(x1!1) -> A(x1,x2!_,x3),B(x1) @ 'off_rate2' #AB dissociation  
  
'a.b12n1' A(x1,x2!_,x3),B(x2) -> A(x1!1,x2!_,x3),B(x2!1) @ 'on_rate2' #A binds B  
'a..b12n1' A(x1!1,x2!_,x3),B(x2!1) -> A(x1,x2!_,x3),B(x2) @ 'off_rate2' #AB dissociation  
  
'a.b11n1d' A(x1,x2!_,x3!_),B(x1) -> A(x1!1,x2!_,x3!_),B(x1!1) @ 'on_rate2' #A binds B  
'a..b11n1d' A(x1!1,x2!_,x3!_),B(x1!1) -> A(x1,x2!_,x3!_),B(x1) @ 'off_rate2' #AB dissociation  
  
'a.b12n1d' A(x1,x2!_,x3!_),B(x2) -> A(x1!1,x2!_,x3!_),B(x2!1) @ 'on_rate2' #A binds B  
'a..b12n1d' A(x1!1,x2!_,x3!_),B(x2!1) -> A(x1,x2!_,x3!_),B(x2) @ 'off_rate2' #AB dissociation  
  
'a.b11n2' A(x1,x3!_,x2),B(x1) -> A(x1!1,x3!_,x2),B(x1!1) @ 'on_rate2' #A binds B  
'a..b11n2' A(x1!1,x3!_,x2),B(x1!1) -> A(x1,x3!_,x2),B(x1) @ 'off_rate2' #AB dissociation  
  
'a.b12n2' A(x1,x3!_,x2),B(x2) -> A(x1!1,x3!_,x2),B(x2!1) @ 'on_rate2' #A binds B  
'a..b12n2' A(x1!1,x3!_,x2),B(x2!1) -> A(x1,x3!_,x2),B(x2) @ 'off_rate2' #AB dissociation  
  
#-----  
  
'a.b21n1' A(x2,x1!_,x3),B(x1) -> A(x2!1,x1!_,x3),B(x1!1) @ 'on_rate2' #A binds B  
'a..b21n1' A(x2!1,x1!_,x3),B(x1!1) -> A(x2,x1!_,x3),B(x1) @ 'off_rate2' #AB dissociation  
  
'a.b22n1' A(x2,x1!_,x3),B(x2) -> A(x2!1,x1!_,x3),B(x2!1) @ 'on_rate2' #A binds B  
'a..b22n1' A(x2!1,x1!_,x3),B(x2!1) -> A(x2,x1!_,x3),B(x2) @ 'off_rate2' #AB dissociation  
  
'a.b21n2' A(x2,x3!_,x1),B(x1) -> A(x2!1,x3!_,x1),B(x1!1) @ 'on_rate2' #A binds B  
'a..b21n2' A(x2!1,x3!_,x1),B(x1!1) -> A(x2,x3!_,x1),B(x1) @ 'off_rate2' #AB dissociation  
  
'a.b22n2' A(x2,x3!_,x1),B(x2) -> A(x2!1,x3!_,x1),B(x2!1) @ 'on_rate2' #A binds B  
'a..b22n2' A(x2!1,x3!_,x1),B(x2!1) -> A(x2,x3!_,x1),B(x2) @ 'off_rate2' #AB dissociation  
  
'a.b21n1d' A(x2,x1!_,x3!_),B(x1) -> A(x2!1,x1!_,x3!_),B(x1!1) @ 'on_rate2' #A binds B  
'a..b21n1d' A(x2!1,x1!_,x3!_),B(x1!1) -> A(x2,x1!_,x3!_),B(x1) @ 'off_rate2' #AB dissociation  
  
'a.b22n1d' A(x2,x1!_,x3!_),B(x2) -> A(x2!1,x1!_,x3!_),B(x2!1) @ 'on_rate2' #A binds B  
'a..b22n1d' A(x2!1,x1!_,x3!_),B(x2!1) -> A(x2,x1!_,x3!_),B(x2) @ 'off_rate2' #AB dissociation  
  
#-----
```

```

'a.b31n1' A(x3,x1!_,x2),B(x1) -> A(x3!1,x1!_,x2),B(x1!1) @ 'on_rate2' #A binds B
'a..b31n1' A(x3!1,x1!_,x2),B(x1!1) -> A(x3,x1!_,x2),B(x1) @ 'off_rate2' #AB dissociation

'a.b32n1' A(x3,x1!_,x2),B(x2) -> A(x3!1,x1!_,x2),B(x2!1) @ 'on_rate2' #A binds B
'a..b32n1' A(x3!1,x1!_,x2),B(x2!1) -> A(x3,x1!_,x2),B(x2) @ 'off_rate2' #AB dissociation

'a.b31n2' A(x3,x2!_,x1),B(x1) -> A(x3!1,x2!_,x1),B(x1!1) @ 'on_rate2' #A binds B
'a..b31n2' A(x3!1,x2!_,x1),B(x1!1) -> A(x3,x2!_,x1),B(x1) @ 'off_rate2' #AB dissociation

'a.b32n2' A(x3,x2!_,x1),B(x2) -> A(x3!1,x2!_,x1),B(x2!1) @ 'on_rate2' #A binds B
'a..b32n2' A(x3!1,x2!_,x1),B(x2!1) -> A(x3,x2!_,x1),B(x2) @ 'off_rate2' #AB dissociation

'a.b31n1d' A(x3,x1!_,x2!_),B(x1) -> A(x3!1,x1!_,x2!_),B(x1!1) @ 'on_rate2' #A binds B
'a..b31n1d' A(x3!1,x1!_,x2!_),B(x1!1) -> A(x3,x1!_,x2!_),B(x1) @ 'off_rate2' #AB dissociation

'a.b32n1d' A(x3,x1!_,x2!_),B(x2) -> A(x3!1,x1!_,x2!_),B(x2!1) @ 'on_rate2' #A binds B
'a..b32n1d' A(x3!1,x1!_,x2!_),B(x2!1) -> A(x3,x1!_,x2!_),B(x2) @ 'off_rate2' #AB dissociation

#### Variables

%var: 'on_rate' 1.8E-6 # per molecule per second
%var: 'off_rate' 0.01 # per second

%var: 'on_rate2' 5.6E-4 # per molecule per second
%var: 'off_rate2' 0.01 # per second

%obs: 'Ax1_B' A(x1!_,x2,x3)
%obs: 'Ax2_B' A(x2!_,x1,x3)
%obs: 'Ax3_B' A(x3!_,x2,x1)

%obs: 'Ax3_B2' A(x1!_,x2!_,x3)
%obs: 'Ax2_B2' A(x1!_,x2,x3!_)
%obs: 'Ax1_B2' A(x1,x2!_,x3!_)

%obs: 'Ax_B3' A(x1!_,x2!_,x3!_)

#### Initial conditions

%init: 5000 A()
%init: 300 B()

### %mod: repeat ([T] [mod] 10)=0 do $SNAPSHOT "prefix" until [false]
### %mod: [T]>99 do $SNAPSHOT
%mod: [T]>10 do $SNAPSHOT "sim1c_obs/snap10"
%mod: [T]>20 do $SNAPSHOT "sim1c_obs/snap20"
%mod: [T]>30 do $SNAPSHOT "sim1c_obs/snap30"
%mod: [T]>40 do $SNAPSHOT "sim1c_obs/snap40"
%mod: [T]>45 do $SNAPSHOT "sim1c_obs/snap45"
%mod: [T]>50 do $SNAPSHOT "sim1c_obs/snap50"
%mod: [T]>60 do $SNAPSHOT "sim1c_obs/snap60"
%mod: [T]>75 do $SNAPSHOT "sim1c_obs/snap75"
%mod: [T]>100 do $SNAPSHOT "sim1c_obs/snap100"
%mod: [T]>125 do $SNAPSHOT "sim1c_obs/snap125"
%mod: [T]>150 do $SNAPSHOT "sim1c_obs/snap150"
%mod: [T]>300 do $SNAPSHOT "sim1c_obs/snap300"
%mod: [T]>1000 do $SNAPSHOT "sim1c_obs/snap1000"

```

```

# file modified from RuleMonkey Library:
# http://public.tgen.org/rulemonkey/download/models/tlbr.html
# Trivalent ligand - Bivalent receptor
# Ring closure reaction is included. All possible cyclic
# combinations may form.

begin parameters
  t_end      1000
  n_steps    100
lig_tot      5000
rec_tot      300

kp1          1.8e-06
km1          0.01
kp2          5.6e-04
km2          0.01
kp3          5.6e-04
km3          0.01
end parameters

begin molecule types
  L(r,r,r)
  R(l,l)
end molecule types

begin species
  L(r,r,r)   Lig_tot
  R(l,l)     Rec_tot
end species

begin reaction rules

# intramolecular interactions only
L(r,r,r) + R(l) <-> L(r,l,r,r).R(l,l) kp1,km1
L(r,r,r,l+) + R(l) <-> L(r,l,r,r,l+).R(l,l) kp2,km2
L(r,r,r,l+,r1+) + R(l) <-> L(r,l,r,l+,r1+).R(l,l) kp3,km3

# allow intramolecular interactions:
L(r,r,l+,r).R(l) <-> L(r,l,r,l+,r).R(l,l) kp2,km2
L(r,r,l+,r1+).R(l) <-> L(r,l,r1+,r1+).R(l,l) kp3,km3

end reaction rules

begin observables
  Species Ligfree   L(r,r,r)
  Species Ligbnd1   L(r,l+,r,r)
  Species Ligbnd2   L(r,l+,r1+,r)
  Species Ligbnd3   L(r,l+,r1+,r1+)
  Species Size      R()=1
  Species Size      R()=2

```

1

```

Species Size      R()=3
Species Size      R()=4
Species Size      R()=5
Species Size      R()=6
Species Size      R()=7
Species Size      R()=8
Species Size      R()=9
Species Size      R()=10
Species Size      R()=11
Species Size      R()=12
Species Size      R()=13
Species Size      R()=14
Species Size      R()=15
Species Size      R()=16
Species Size      R()=17
Species Size      R()=18
Species Size      R()=19
Species Size      R()=20
Species Size      R()=21
Species Size      R()=22
Species Size      R()=23
Species Size      R()=24
Species Size      R()=25
Species Size      R()=26
Species Size      R()=27
Species Size      R()=28
Species Size      R()=29
Species Size      R()=30
Species Size      R()=31
Species Size      R()=32
Species Size      R()=33
Species Size      R()=34
Species Size      R()=35
Species Size      R()=36
Species Size      R()=37
Species Size      R()=38
Species Size      R()=39
Species Size      R()=40
Species Size      R()=41
Species Size      R()=42
Species Size      R()=43
Species Size      R()=44
Species Size      R()=45
Species Size      R()=46
Species Size      R()=47
Species Size      R()=48
Species Size      R()=49
Species Size      R()=50
Species Size      R()=51
Species Size      R()=52
Species Size      R()=53
Species Size      R()=54

```

2

Species Size R()=55  
Species Size R()=56  
Species Size R()=57  
Species Size R()=58  
Species Size R()=59  
Species Size R()=60  
Species Size R()=61  
Species Size R()=62  
Species Size R()=63  
Species Size R()=64  
Species Size R()=65  
Species Size R()=66  
Species Size R()=67  
Species Size R()=68  
Species Size R()=69  
Species Size R()=70  
Species Size R()=71  
Species Size R()=72  
Species Size R()=73  
Species Size R()=74  
Species Size R()=75  
Species Size R()=76  
Species Size R()=77  
Species Size R()=78  
Species Size R()=79  
Species Size R()=80  
Species Size R()=81  
Species Size R()=82  
Species Size R()=83  
Species Size R()=84  
Species Size R()=85  
Species Size R()=86  
Species Size R()=87  
Species Size R()=88  
Species Size R()=89  
Species Size R()=90  
Species Size R()=91  
Species Size R()=92  
Species Size R()=93  
Species Size R()=94  
Species Size R()=95  
Species Size R()=96  
Species Size R()=97  
Species Size R()=98  
Species Size R()=99  
Species Size R()=100  
Species Size R()=101  
Species Size R()=102  
Species Size R()=103  
Species Size R()=104  
Species Size R()=105

Species Size R()=106  
Species Size R()=107  
Species Size R()=108  
Species Size R()=109  
Species Size R()=110  
Species Size R()=111  
Species Size R()=112  
Species Size R()=113  
Species Size R()=114  
Species Size R()=115  
Species Size R()=116  
Species Size R()=117  
Species Size R()=118  
Species Size R()=119  
Species Size R()=120  
Species Size R()=121  
Species Size R()=122  
Species Size R()=123  
Species Size R()=124  
Species Size R()=125  
Species Size R()=126  
Species Size R()=127  
Species Size R()=128  
Species Size R()=129  
Species Size R()=130  
Species Size R()=131  
Species Size R()=132  
Species Size R()=133  
Species Size R()=134  
Species Size R()=135  
Species Size R()=136  
Species Size R()=137  
Species Size R()=138  
Species Size R()=139  
Species Size R()=140  
Species Size R()=141  
Species Size R()=142  
Species Size R()=143  
Species Size R()=144  
Species Size R()=145  
Species Size R()=146  
Species Size R()=147  
Species Size R()=148  
Species Size R()=149  
Species Size R()=150  
Species Size R()=151  
Species Size R()=152  
Species Size R()=153  
Species Size R()=154  
Species Size R()=155  
Species Size R()=156  
Species Size R()=157



Species Size R()=158  
Species Size R()=159  
Species Size R()=160  
Species Size R()=161  
Species Size R()=162  
Species Size R()=163  
Species Size R()=164  
Species Size R()=165  
Species Size R()=166  
Species Size R()=167  
Species Size R()=168  
Species Size R()=169  
Species Size R()=170  
Species Size R()=171  
Species Size R()=172  
Species Size R()=173  
Species Size R()=174  
Species Size R()=175  
Species Size R()=176  
Species Size R()=177  
Species Size R()=178  
Species Size R()=179  
Species Size R()=180  
Species Size R()=181  
Species Size R()=182  
Species Size R()=183  
Species Size R()=184  
Species Size R()=185  
Species Size R()=186  
Species Size R()=187  
Species Size R()=188  
Species Size R()=189  
Species Size R()=190  
Species Size R()=191  
Species Size R()=192  
Species Size R()=193  
Species Size R()=194  
Species Size R()=195  
Species Size R()=196  
Species Size R()=197  
Species Size R()=198  
Species Size R()=199  
Species Size R()=200  
Species Size R()=201  
Species Size R()=202  
Species Size R()=203  
Species Size R()=204  
Species Size R()=205  
Species Size R()=206  
Species Size R()=207  
Species Size R()=208

Species Size R()=209  
Species Size R()=210  
Species Size R()=211  
Species Size R()=212  
Species Size R()=213  
Species Size R()=214  
Species Size R()=215  
Species Size R()=216  
Species Size R()=217  
Species Size R()=218  
Species Size R()=219  
Species Size R()=220  
Species Size R()=221  
Species Size R()=222  
Species Size R()=223  
Species Size R()=224  
Species Size R()=225  
Species Size R()=226  
Species Size R()=227  
Species Size R()=228  
Species Size R()=229  
Species Size R()=230  
Species Size R()=231  
Species Size R()=232  
Species Size R()=233  
Species Size R()=234  
Species Size R()=235  
Species Size R()=236  
Species Size R()=237  
Species Size R()=238  
Species Size R()=239  
Species Size R()=240  
Species Size R()=241  
Species Size R()=242  
Species Size R()=243  
Species Size R()=244  
Species Size R()=245  
Species Size R()=246  
Species Size R()=247  
Species Size R()=248  
Species Size R()=249  
Species Size R()=250  
Species Size R()=251  
Species Size R()=252  
Species Size R()=253  
Species Size R()=254  
Species Size R()=255  
Species Size R()=256  
Species Size R()=257  
Species Size R()=258  
Species Size R()=259  
Species Size R()=260

```
Species Size R()=261
Species Size R()=262
Species Size R()=263
Species Size R()=264
Species Size R()=265
Species Size R()=266
Species Size R()=267
Species Size R()=268
Species Size R()=269
Species Size R()=270
Species Size R()=271
Species Size R()=272
Species Size R()=273
Species Size R()=274
Species Size R()=275
Species Size R()=276
Species Size R()=277
Species Size R()=278
Species Size R()=279
Species Size R()=280
Species Size R()=281
Species Size R()=282
Species Size R()=283
Species Size R()=284
Species Size R()=285
Species Size R()=286
Species Size R()=287
Species Size R()=288
Species Size R()=289
Species Size R()=290
Species Size R()=291
Species Size R()=292
Species Size R()=293
Species Size R()=294
Species Size R()=295
Species Size R()=296
Species Size R()=297
Species Size R()=298
Species Size R()=299
Species Size R()=300
end observables
```

```
simulate_rm(t_end=>t_end,n_steps=>n_steps);
```
